# Supplementary material
Source: PubMed Central journal article supplement (PMC2808205)

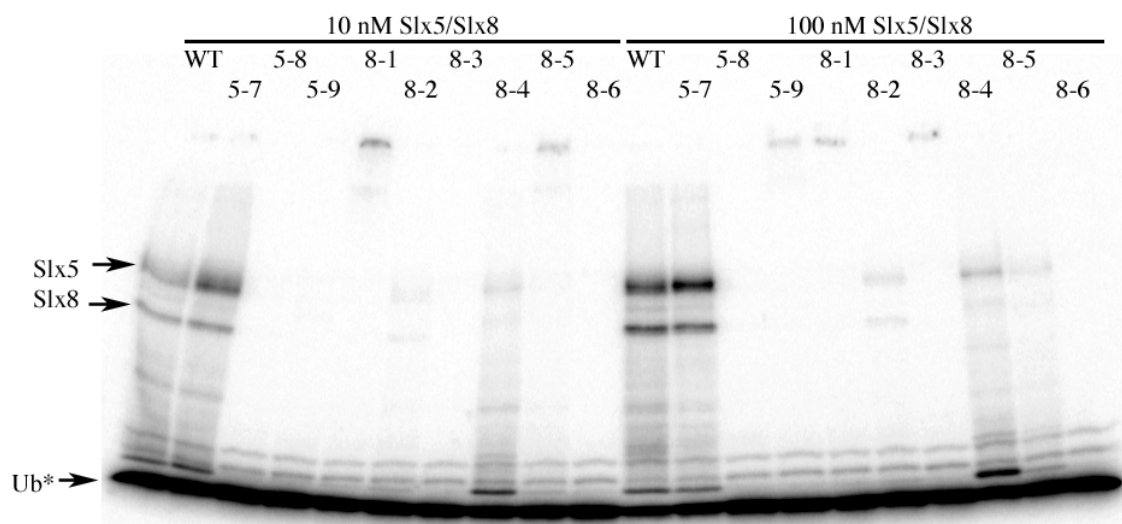

**Figure S1**  
*Li et al.*

Supplement: NIHMS164869-supplement-Sup_Fig__1.pdf [file NIHMS164869-supplement-Sup_Fig__1.pdf]

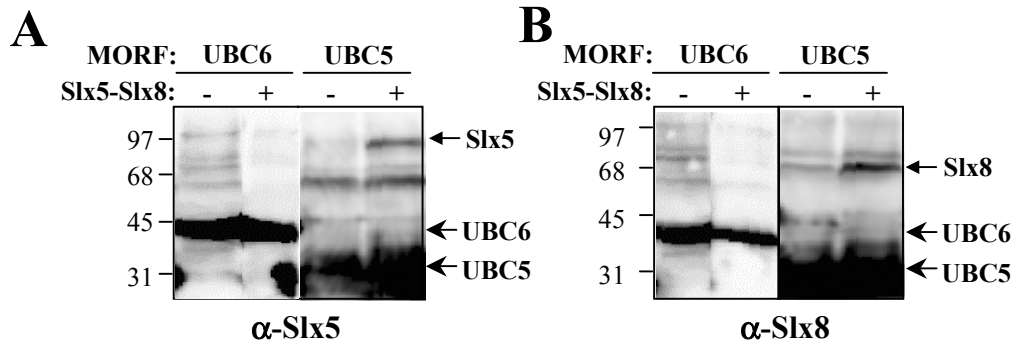

**Figure S2**  
*Li et al.*

Supplement: NIHMS164869-supplement-Sup_Fig__2.pdf [file NIHMS164869-supplement-Sup_Fig__2.pdf]
